# Supplementary material for: High-performance hardware architectures for multi-level lifting-based discrete wavelet transform
Source: Springer Nature journal article supplement (doi:10.1186/1687-5281-2014-47), 2014-10-03
Supplement: 13640_2014_142_MOESM13_ESM.pdf [file 13640_2014_142_MOESM13_ESM.pdf]

| On-line | R1 | R2 | R3     | R4     | R5     | R6     | R7     | R8     | Output |
|---------|----|----|--------|--------|--------|--------|--------|--------|--------|
| 3       | 2' | 2  | 1'     | 1      | 0      | 0      | 0      | 0      | 0      |
| 3'      | 3  | 2' | $P_0$  | 1'     | 1      | 0      | 0      | 0      | 0      |
| 4       | 3' | 3  | $P'_0$ | $P_0$  | 1'     | 1      | 0      | 0      | $P_0$  |
| 4'      | 4  | 3' | 3      | $P'_0$ | $P_0$  | 1'     | $U_0$  | 0      | $P'_0$ |
| 5       | 4' | 4  | 3'     | 3      | $P'_0$ | $P_0$  | $U'_0$ | $U_0$  | $U_0$  |
| 5'      | 5  | 4' | $P_1$  | 3'     | 3      | $P'_0$ | $P_0$  | $U'_0$ | $U'_0$ |
| 6       | 5' | 5  | $P'_1$ | $P_1$  | 3'     | 3      | $P'_0$ | $P_0$  | $P_1$  |
| 6'      | 6  | 5' | 5      | $P'_1$ | $P_1$  | 3'     | $U_1$  | $P'_0$ | $P'_1$ |

1 => First level LL  
coeff.

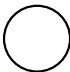

PREDICT

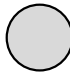

UPDATE

1' => Higher level LL  
coeff.

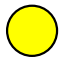

pre/upd output
