# Supplementary material for: High-performance hardware architectures for multi-level lifting-based discrete wavelet transform
Source: Springer Nature journal article supplement (doi:10.1186/1687-5281-2014-47), 2014-10-03

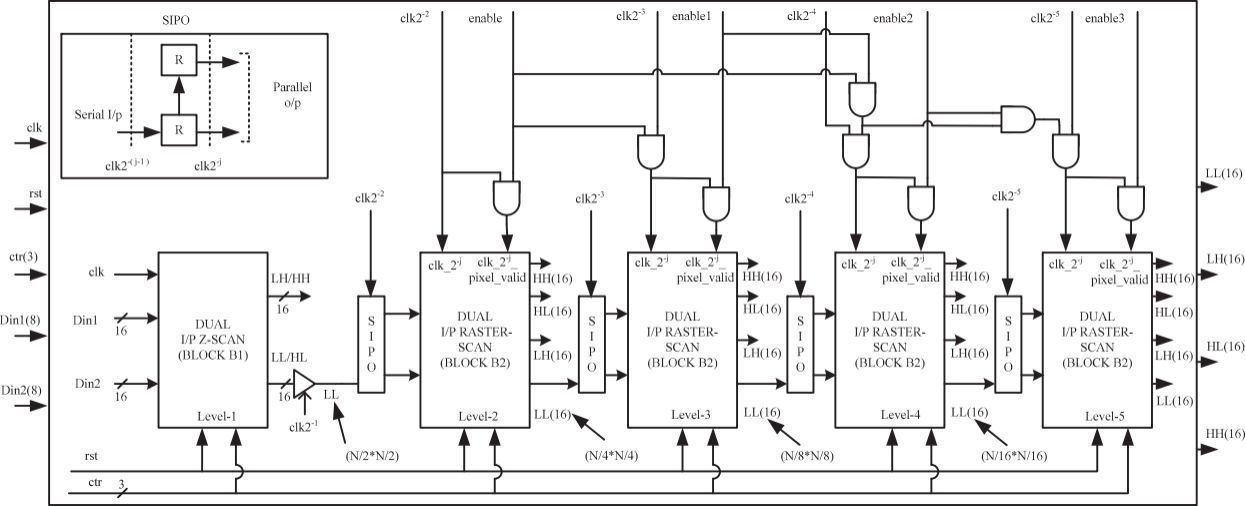

Supplement: 13640_2014_142_MOESM17_ESM.pdf [file 13640_2014_142_MOESM17_ESM.pdf]
