# Supplementary material for: High-performance hardware architectures for multi-level lifting-based discrete wavelet transform
Source: Springer Nature journal article supplement (doi:10.1186/1687-5281-2014-47), 2014-10-03
Supplement: 13640_2014_142_MOESM21_ESM.pdf [file 13640_2014_142_MOESM21_ESM.pdf]

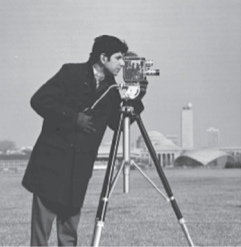

(a)

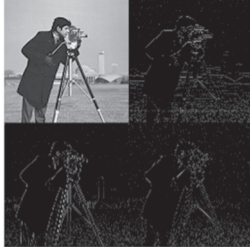

(b)

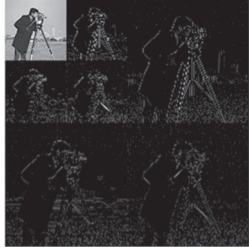

(c)

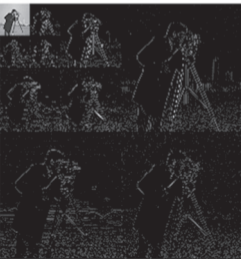

(d)

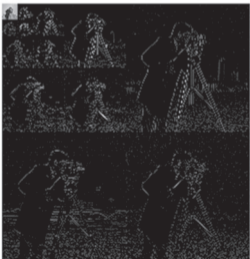

(e)

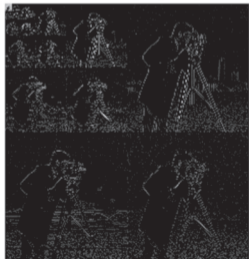

(f)
